# Supplementary material for: Extension of the CAVS model to the simulation of helical peptides in a membrane environment
Source: Royal Society of Chemistry journal article supplement (doi:10.1039/d1cp01238j), 2021-01-01

**Figure SR1.** PMFs of the backbone ( $\phi$ ,  $\psi$ ) distributions for glycine, alanine, proline dipeptides, obtained from the CAVS force field (left panel) and the Dunbrack library (right panel).

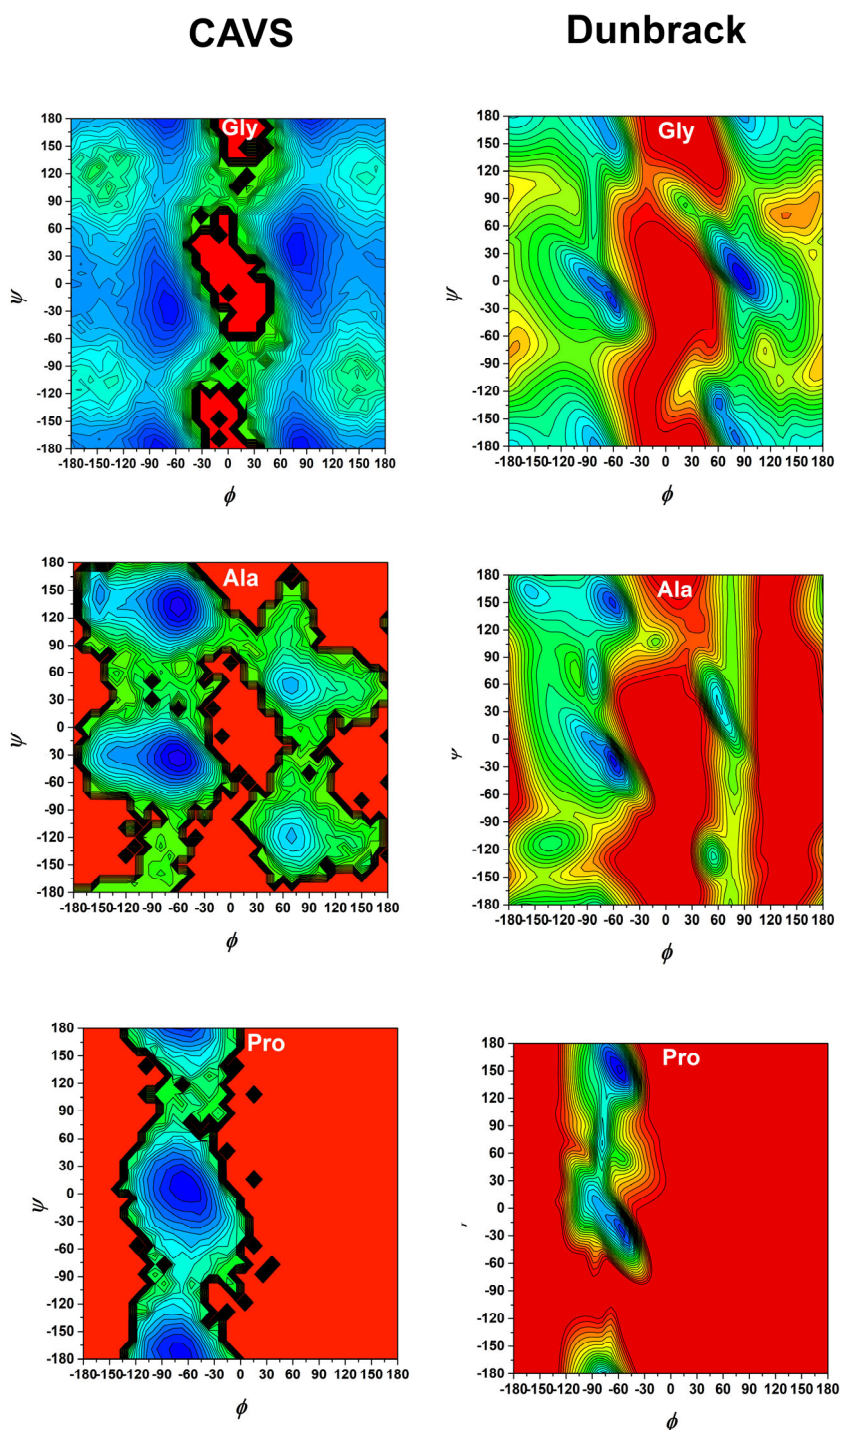

Supplement: d1cp01238j1.pdf [file d1cp01238j1.pdf]
